# Supplementary material for: Cost-Effectiveness of Offering Cervical Cancer Screening with HPV Self-Sampling among African-American Women in the Mississippi Delta
Source: Oxford University Press journal article supplement (doi:10.1158/1055-9965.epi-20-1673), 2021-03-26
Supplement: 10559965epi201673-sup-256064_2_supp_6974338_qppybl.xlsx [file 10559965epi201673-sup-256064_2_supp_6974338_qppybl.xlsx]

## Sheet: Supplies
Itemized cost of supplies, by procedure.
Instrument sterilization (applies to Pap/HPV cotest, Colposcopy, and LEEP)			Pap/HPV co-test at Health Department			Colposcopy			LEEP
Supply	Cost per procedure (2019 US$)		Supply	Cost per procedure (2019 US$)		Supply	Cost per procedure (2019 US$)		Supply	Cost per procedure (2019 US$)
gloves	0.1		Exam table paper	0.08		Exam table paper	0.08		Exam table paper	0.08
dish soap	0.08		Disposable sheet	0.15		Disposable sheet	0.15		Disposable sheet	0.15
betadine	1.3		Examination gloves	0.1		Examination gloves	0.1		Examination gloves	0.1
autoclave pouch	0.2		Water soluble lubricant	0.05		Water soluble lubricant	0.05		Cotton tipped applicator	0.06
spore ampoule test kit	0.29		Cotton tipped applicator	0.06		Cotton tipped applicator	0.06		Large OB procto swabs	2.59
Total:	1.97		ThinPrep Cytobrush & spatula	2.01		Cotton balls	0.02		Acetic acid 3-5%	1.29
			ThinPrep Solution Vial	2.01		Acetic acid 3-5%	0.22		Disposable leg pads	9.89
			Disposable speculum	2.2		Saline	0		Disposable connecting cable	7.08
			Sanitary pad	0.26		Monsol's solution	1.76		Ball electrode	14.99
			Total:	6.92		Cytobrush	0.36		Radius loop electrode	14.99
						Disposable speculum	2.2		LEEP REdiKit	62.25
						Sanitary pad	0.26		Patient return pad	8.79
						Total:	5.26		Smoke evacuator tubing set	1.25
									Handpieces	6.02
									ULPA filter	10.27
									Total:	139.8
Standard of care' arm: CHW supplies			Choice' arm: CHW supplies
Supply	Cost per woman screened (2019 US$)		Supply	Cost per woman screened (2019 US$)
Large envelopes	5.71		Large envelopes	1.23
Educational brochure	79.97		Educational brochure	17.25
Address labels	0.85		Address labels	0.24
Fuel	94.74		HPV test kit (if choose HPV self-sample)	2.08
Total	181.27		Stamp (if choose HPV self-sample)	1.15
			Envelope (if choose HPV self-sample)	0.17
			Sanitary pad (if choose HPV self-sample)	0.42
			Fuel	21.05
			Total (choose HPV self-sample)	43.59
			Total (choose Pap)	39.77

## Sheet: Laboratory
Itemized cost of laboratory procedures.
Laboratory transport		Laboratory charges
Cost per cervical specimen (2019 US$)		Specimen	Cost per test (2019 US$)
7.14		Pap	36.34
		HPV test	43.08
		Biopsy (level IV)	74.1

## Sheet: Equipment
Itemized cost of equipment, by procedure.
Pap/HPV cotest (Health Department)				Colposcopy				LEEP
Item	Lifetime of equipment (yrs)	Cost per procedure (2019 US$)		Item	Lifetime of equipment (yrs)	Cost per procedure (2019 US$)		Item	Lifetime of equipment (yrs)	Cost per procedure (2019 US$)
Ring forceps	7.5	0.05		Ring forceps	7.5	0.195808		Colposcope	10	14.5034
Total		0.05		Colposcope	10	11.944		LEEP machine	10	8.70506
				Biopsy instruments	10	4.33505		Coated speculum with smoke evacuator slots	7.5	0.897854
				Endocervical curette	7.5	2.05222		Total		24.1064
				Total		18.5271
Standard of care' arm: CHW Intervention equipment				Choice' arm: CHW Intervention equipment
Item	Lifetime of equipment (yrs)	Cost per woman screened (2019 US$)		Item	Lifetime of equipment (yrs)	Cost per woman screened (2019 US$)
Mobile files for locking participant information	5	1.25		Mobile files for locking participant information	5	0.28
Laptop (including software)	5	28.17		Laptop (including software)	5	6.26
CHW training manual	3	5.11		CHW training manual	3	1.14
CHW notebooks	3	0.86		CHW notebooks	3	0.19
Cell phone and plan	3	100.18		Cell phone and plan	3	22.26
Total		135.57		Total		30.13

## Sheet: Personnel
Itemized cost of personnel time, by procedure.
Pap/HPV co-test			Colposcopy			LEEP
Activity	Cost per procedure (2019 US$)		Activity	Cost per procedure (2019 US$)		Activity	Cost per procedure (2019 US$)
Pap/HPV co-test (clerical intake; nurse's aide blood pressure/pregnancy test; RN intake; Nurse practitioner exam; RN: exit interview and follow-up instructions; clerk after-visit summary/appointment)	30.89		Colposcopy (clerical intake; nurse's aide blood pressure and pregnancy test; Nurse practitioner exam; RN: exit interview and follow-up instructions; clerk follow-up)	32.61		LEEP (clerical intake; nurse's aide weight; RN intake; Obstetrician/gynecologist procedure)	31.77
Results delivery (RN)	2.43		Results delivery	2.74		Total:	31.77
Total:	33.32		Total:	35.35
Standard of care' arm			Choice' arm
Activity	Cost per woman screened (2019 US$)		Activity	Cost per woman screened (2019 US$)
CHW, training	63.12		CHW, training	14.03
Trainer, training	112.58		Trainer, training	25.02
Program coordinator, training	63.14		Program coordinator, training	14.03
CHWs, quality control meetings	347.02		CHWs, quality control meetings	77.09
Program coordinator, quality control meetings	347.06		Program coordinator, quality control meetings	77.15
CHW, recruitment	44.7		CHW, recruitment	9.76
CHW, follow-up	91.38		CHW, follow-up	8.45
Total	1069		CHW, results delivery (if choose HPV self-sample)	21.93
			Program coordinator, results preparation (if choose HPV self-sample)	26.1
			Total (choose HPV self-sample)	273.56
			Total (choose Pap)	225.53

## Sheet: Women's time
Itemized cost of women's time, by procedure.
Women's time (transportation, waiting, receiving care)
Activity	Average minutes, across facilities	Cost per procedure (2019 US$)
HPV self-sampling and mailing	10	2.29
HPV results	5	1.14
Pap/HPV co-test at Health Department	98.75	22.57
Receiving Pap/HPV co-test results	7.5	1.71
Colposcopy	72.5	16.57
Receiving colposcopy results	5.625	1.29
LEEP	82.5	18.85
Transportation, Pap/HPV co-test	33	7.54
Transportation, Colposcopy	52.25	11.94
Transportation, LEEP	159.83	36.53

## Sheet: Women's transportation
Women's transportation costs, by procedure.
Women's Transportation
Procedure	Round-trip miles to facility	Round-trip transportation cost (2019 US$)
Pap/HPV Co-testing (Bolivar, Sunflower, Washington Counties, average)	24	2.29
Colposcopy (Washington, Leflore Counties, average	42.9	4.08
LEEP (Grenada County)	139.67	13.29
