# Supplementary material for: Cost-Effectiveness of Offering Cervical Cancer Screening with HPV Self-Sampling among African-American Women in the Mississippi Delta
Source: Oxford University Press journal article supplement (doi:10.1158/1055-9965.epi-20-1673), 2021-03-26
Supplement: 10559965epi201673-sup-256064_2_supp_6974339_qppybl.docx [file 10559965epi201673-sup-256064_2_supp_6974339_qppybl.docx]

**Supplemental Table 1. Study eligibility, enrollment, and adherence, by arm.**

|  | | **‘Standard of care screening’** | **‘Choice’** | |
| --- | --- | --- | --- | --- |
| Eligible | | 173 | 173 | |
| Enrolled | | 170 | 165 | |
|  | |  | Select Pap/cotest at Health Department | Select HPV self-sampling at home |
| Selected strategy | | NA | 40 | 125 |
| Adhered to screening | | 14* | 3 | 60 |
| Received results | | 14 | 3 | 58 |
| Referred to colposcopy | | 1 | 0 | 14 |
| Attended colposcopy | | 1 | 0 | 4 |
| Referred to treatment | | 0 | 0 | 0 |
| * | Two women in the ‘Standard of care screening’ arm reported receiving screening at a private provider, but are not included here. | | | |
