# Supplementary material for: Cost-Effectiveness of Offering Cervical Cancer Screening with HPV Self-Sampling among African-American Women in the Mississippi Delta
Source: Oxford University Press journal article supplement (doi:10.1158/1055-9965.epi-20-1673), 2021-03-26
Supplement: 10559965epi201673-sup-256064_2_supp_6974340_qppybl.docx [file 10559965epi201673-sup-256064_2_supp_6974340_qppybl.docx]

**Supplemental Table 3. Cost per woman screened, by cost component.**

| **Costs** | **Procedure** | | | | | |
| --- | --- | --- | --- | --- | --- | --- |
|  | **Intervention costs: ‘Choice’: HPV self-sampling** | **Intervention costs: ‘Choice’: Pap/HPV co-test at Health Department** | **Intervention costs: ‘Standard of care screening’: Pap/HPV co-test at Health Department** | **Pap/HPV co-test at Health Department** | **Colposcopy** | **LEEP** |
| Direct medical costs |  |  |  |  |  |  |
| Supplies | 43.59 | 39.77 | 181.27 | 8.89 | 7.23 | 141.77 |
| Personnel time | 273.56 | 225.53 | 1,069.00 | 33.32 | 35.35 | 31.77 |
| Equipment | 30.13 | 30.13 | 135.57 | 0.05 | 18.53 | 24.11 |
| Laboratory transport | 7.14 | -- | -- | 7.14 | 7.14 | -- |
| Laboratory processing | 43.08 | -- | -- | 79.42 | 74.10 | -- |
| *Total direct medical cost per woman screened* | *397.50* | *295.43* | *1,385.84* | *128.82* | *142.34* | *197.65* |
| *Total women’s transportation cost (round-trip)* | *--* | *--* | *--* | *2.29* | *4.08* | *13.29* |
| *Total women’s time cost (transportation, waiting, receiving care)* | *3.43* | *--* | *--* | *31.82* | *29.80* | *55.38* |
| **Total cost per woman screened** | **400.93** | **295.43** | **1,385.84** | **162.93** | **176.23** | **266.32** |
